# Supplementary material for: Rapid fabrication of silver microplates under an oxidative etching environment consisting of O2/Cl−, NH4OH/H2O2, and H2O2
Source: Royal Society of Chemistry journal article supplement (doi:10.1039/c5ce00603a), 2015-01-01
Supplement: c5ce00603a1.pdf [file c5ce00603a1.pdf]

## Supporting Information

### Rapid Fabrication of Silver Microplates under an Oxidative Etching

Environment Consisting of O<sub>2</sub>/Cl<sup>-</sup>, NH<sub>4</sub>OH/H<sub>2</sub>O<sub>2</sub>, and H<sub>2</sub>O<sub>2</sub>

*Harnchana Gatemala, Prompong Pienpinijtham, Chuchaat Thammacharoen, Sanong Ekgasit\**

Sensor Research Unit, Department of Chemistry, Faculty of Science, Chulalongkorn University 254 Phyathai Road, Patumwan, Bangkok 10330, Thailand

E-mail: sanong.e@chula.ac.th

**Keywords:** Silver Microplate, Hydrogen Peroxide, Selective Etching, Surface Passivation, Silver Ammine Complex

The chemical reactions in the synthesis of silver microplates (AgMPs) under an oxidative etching environment of O<sub>2</sub>/Cl<sup>-</sup>, NH<sub>4</sub>OH/H<sub>2</sub>O<sub>2</sub>, and H<sub>2</sub>O<sub>2</sub> with H<sub>2</sub>O<sub>2</sub> as a sole reducing agent include:

- The formation of [Ag(NH<sub>3</sub>)<sub>2</sub>]<sup>+</sup> complex

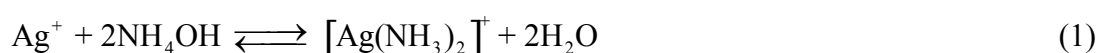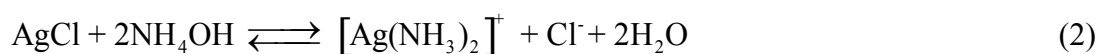

- The reduction reaction

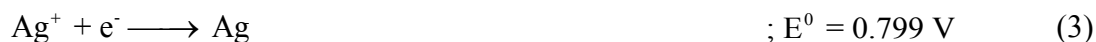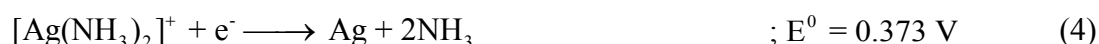

- The oxidation reaction

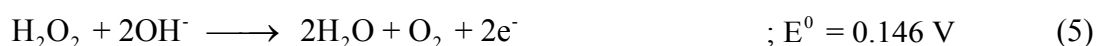

- The redox reaction

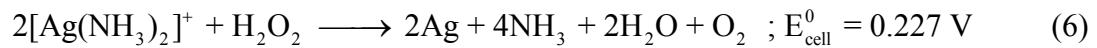

- Decomposition of  $\text{H}_2\text{O}_2$

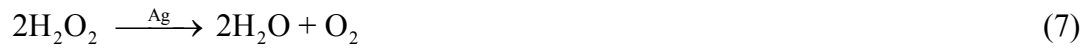

- Oxidative etching of metallic silver

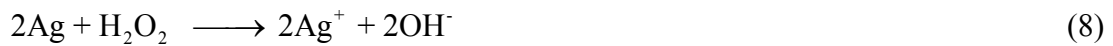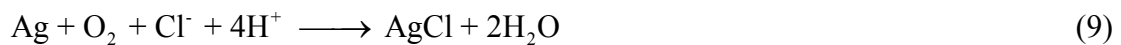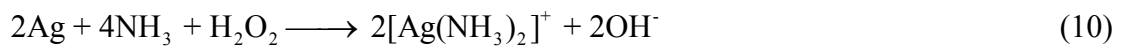

According to the above equations, the co-existences of  $\text{H}_2\text{O}_2$ ,  $\text{Cl}^-$ ,  $\text{NH}_4\text{OH}$ , and the *in-situ* generated  $\text{O}_2$  gas made the reaction medium an efficient oxidant for metallic silver. The etchants consisting of  $\text{H}_2\text{O}_2$ ,<sup>1</sup>  $\text{O}_2/\text{Cl}^-$ ,<sup>2-5</sup> and  $\text{NH}_4\text{OH}/\text{H}_2\text{O}_2$ ,<sup>6, 7</sup> are known to oxidatively dissolve metallic silver to silver ion. However, the passivation of  $\text{Ag}\{111\}$  by  $\text{NH}_3$ ,<sup>8</sup>  $\text{Cl}^-$ ,<sup>9-13</sup> and  $\text{AgCl}$ ,<sup>13-15</sup> enabled the survival of plate structure in such an oxidative environment.

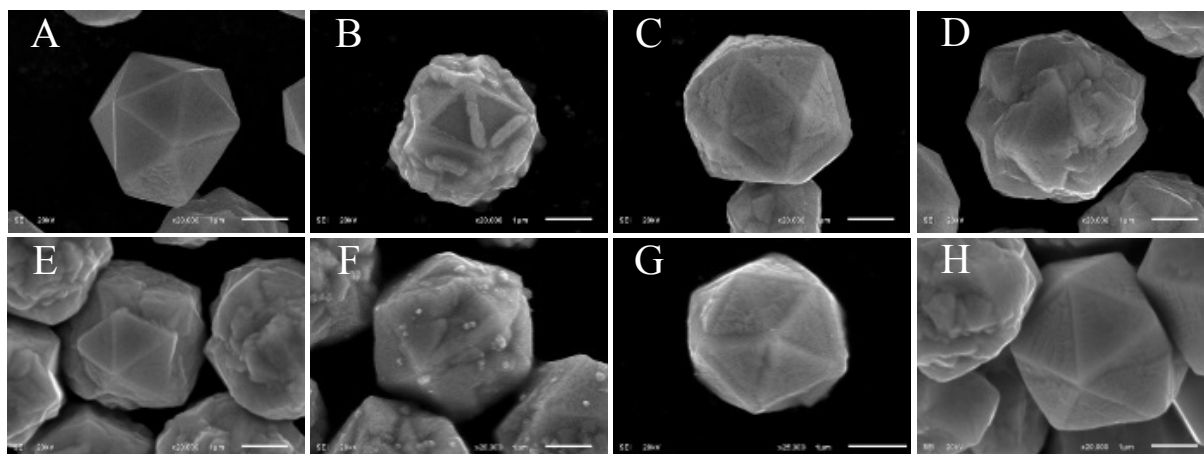

**Figure S1.** SEM micrographs show the structural evolution of icosahedra under  $\text{H}_2\text{O}_2$ -reduction of  $[\text{Ag}(\text{NH}_3)_2]^+$  complex without  $\text{Cl}^-$ . The irregular shapes of silver microstructures are, in fact, the under developed icosahedra. The above SEM micrographs suggest that the structure grows layer-by-layer.

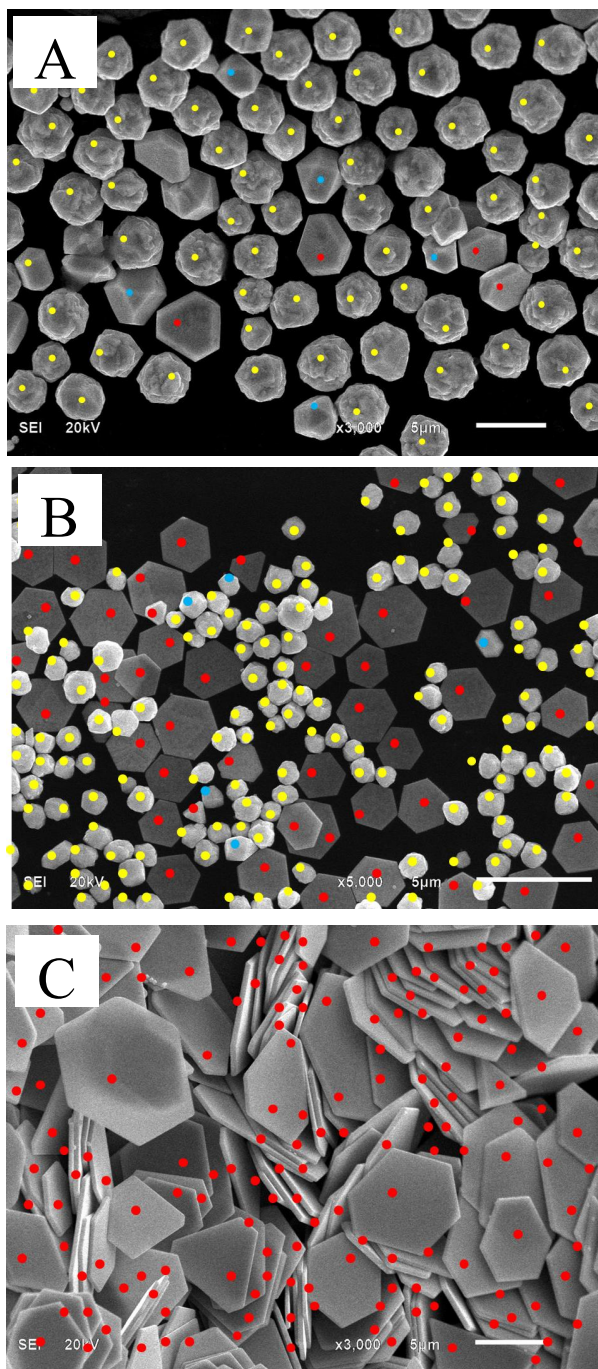

**Figure S2.** SEM micrographs of silver microparticles synthesized with  $\text{Cl}^-$  concentration of: (A) 0 mM, (B) 0.05 mM, and (C) 4 mM. The experimental conditions are  $[\text{AgNO}_3] = 10 \text{ mM}$ ,  $[\text{H}_2\text{O}_2] = 220 \text{ mM}$ ,  $[\text{NH}_4\text{OH}] = 90 \text{ mM}$ ,  $[\text{PVP}] = 0.5\% \text{ w/v}$ . The number average of the structures were calculated from more than 500 particles of unique SEM micrographs. The colours represent: yellow = multiply twinned particles, blue = single crystal particles, and red = plates.

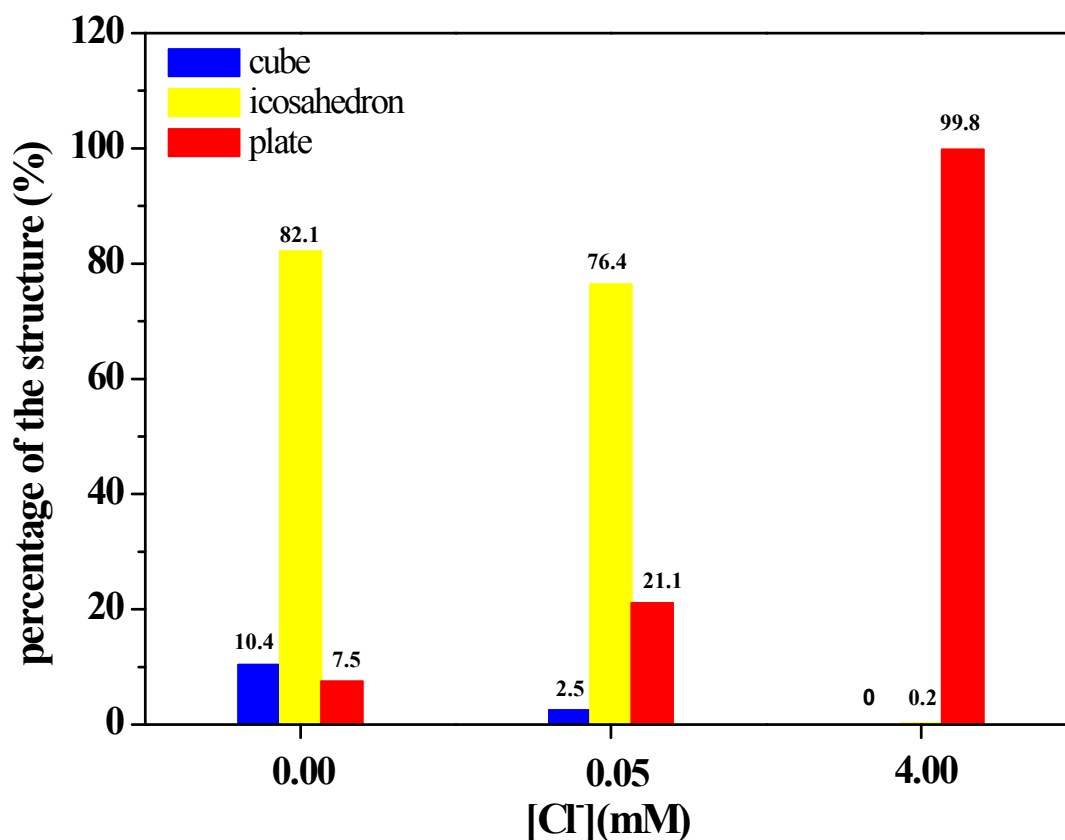

**Figure S3.** Percentage of cubic, icosahedral, and microplate silver crystals in synthetic conditions shown in Figure 2. The results indicated that Cl<sup>-</sup> played an important role as a structural controlling agent as it selectively destroys structure with Ag{100} facet (i.e., cube, icosahedron) while preserves those with Ag{111} (i.e., plate). At Cl<sup>-</sup> concentrations greater than 4 mM, the survived population was plate-structures while cubes and icosahedra were disappeared.

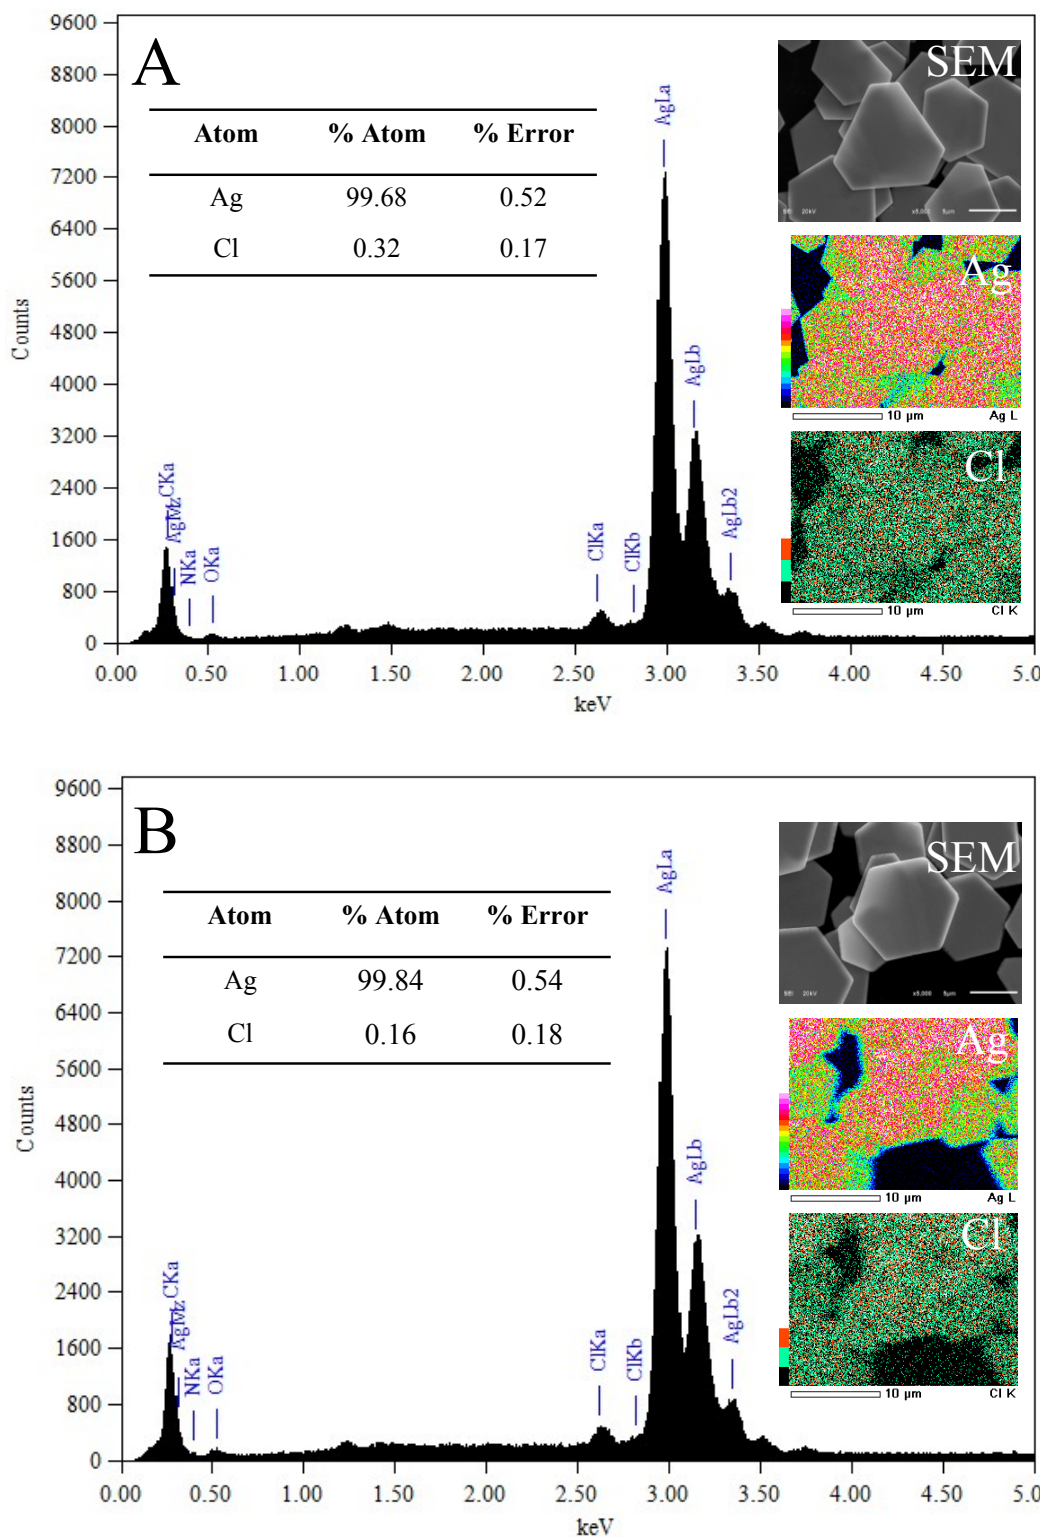

**Figure S4.** EDS spectra of AgMPs (A) before and (B) after washing with 0.1 M  $\text{NH}_4\text{OH}$  solution. The disappearance of chlorine after washing confirmed the presence of AgCl layer on the surface of as-synthesized AgMPs.

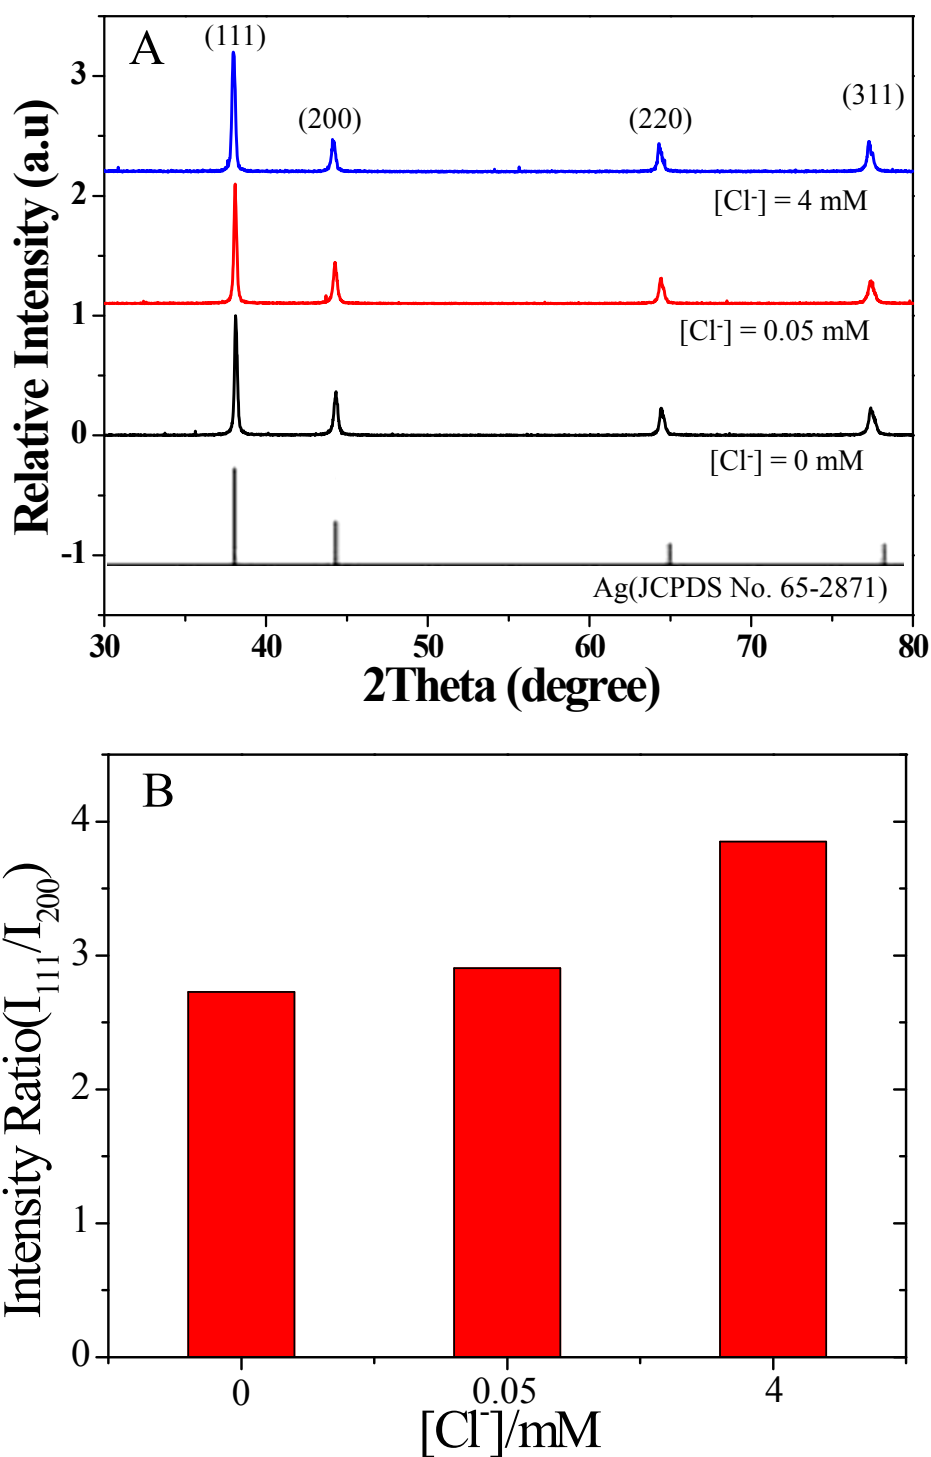

**Figure S5.** (A) XRD patterns of AgMPs synthesized with different  $\text{Cl}^-$  concentrations shown in Figure S2. (B) The plot of intensity ratios of (111) and (200) peaks indicates an increment of plate structure with  $[\text{Cl}^-]$ . All patterns correspond to fcc crystal of silver metal (JCPDS No.65-2871).

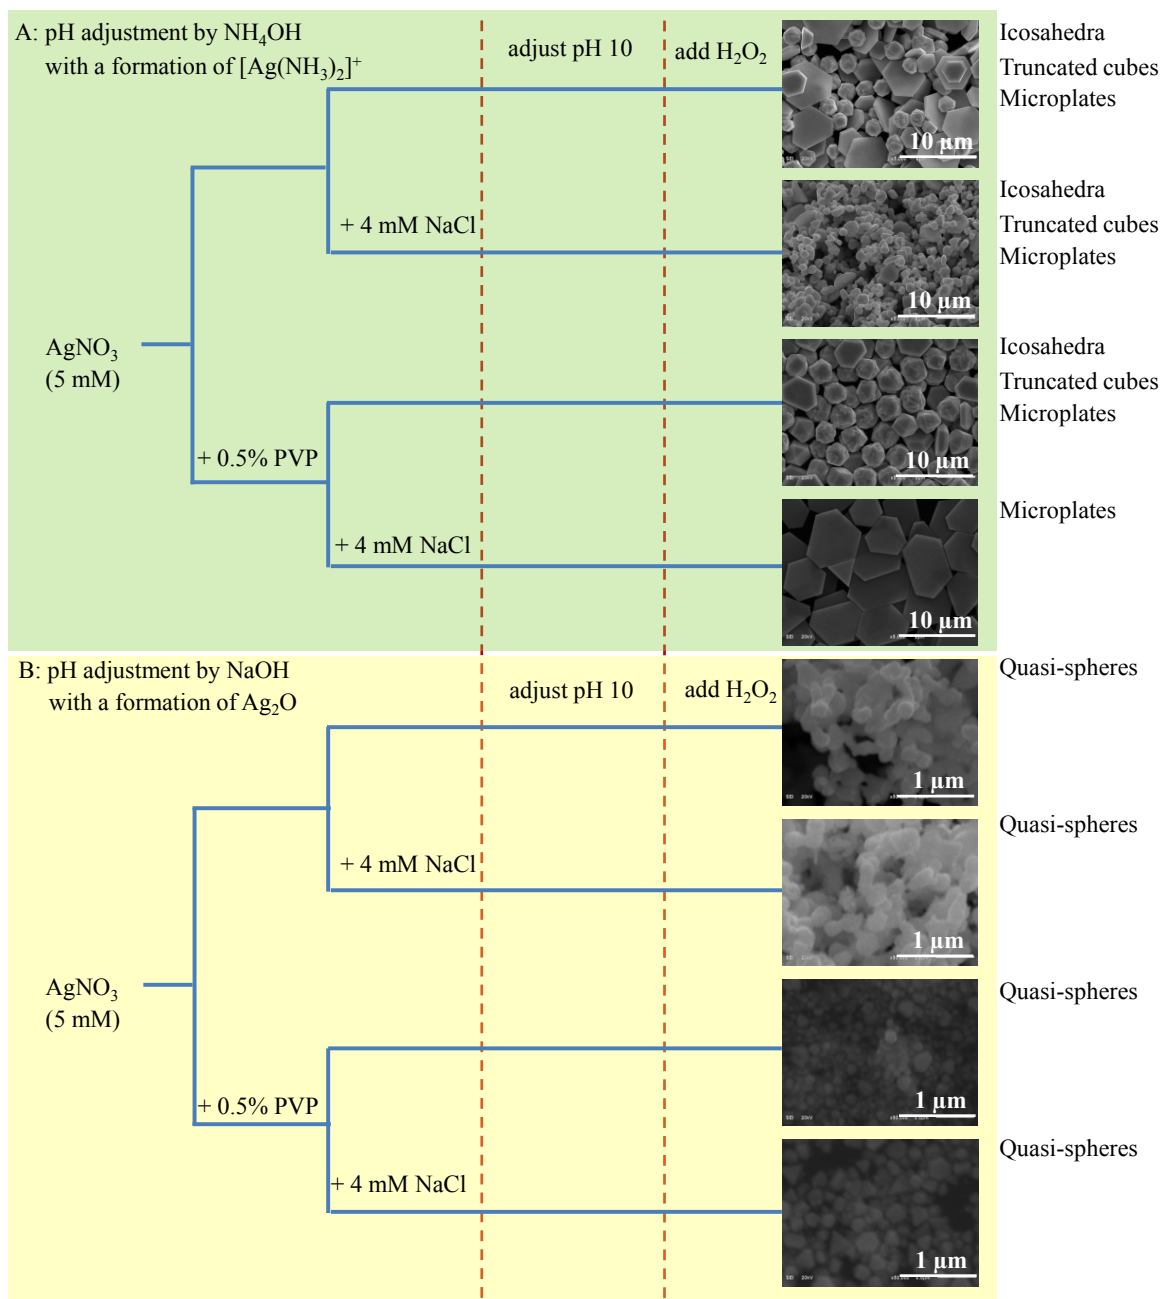

**Figure S6.** Influences of reaction media on the formation of silver micro/nanostructures under alkaline- $\text{H}_2\text{O}_2$  (pH 10) induced by (A)  $\text{NH}_4\text{OH}$  and (B)  $\text{NaOH}$ . The obtained silver micro/nanostructures suggested that the presence of  $\text{Cl}^-$  and  $\text{NH}_4\text{OH}$  is crucial for the development of plate structure. PVP is an efficient stabilizer preventing the aggregation while assisting the formation of large silver microstructures.



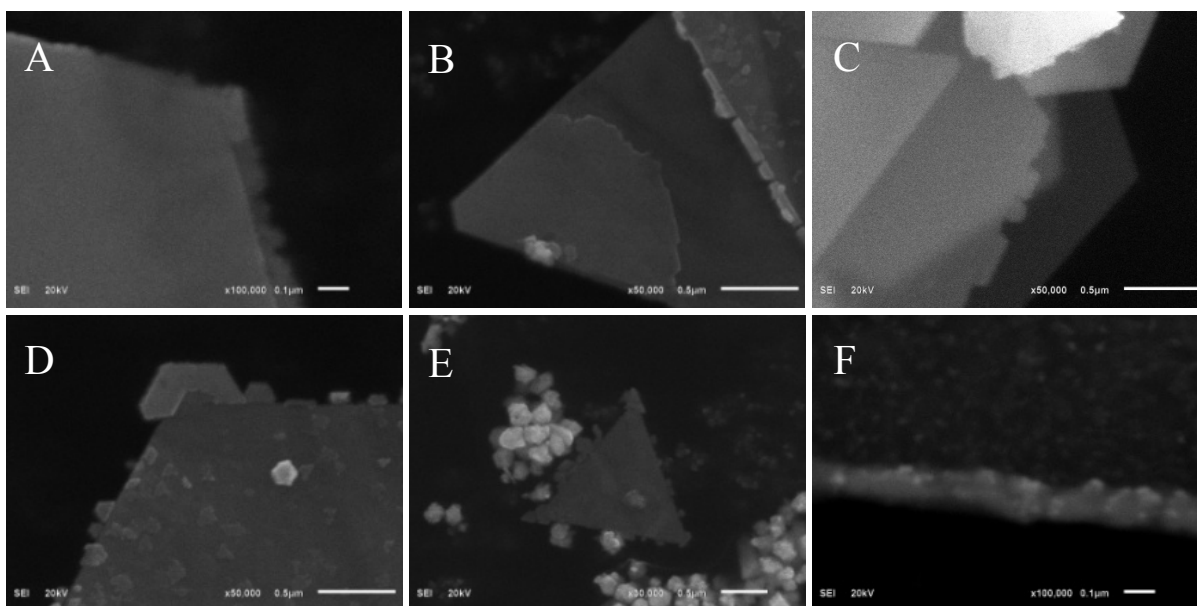

**Figure S7.** SEM micrographs show evidences of the lateral growth of AgMPs.

According to the experimentally observed phenomena, the following growth mechanism was proposed for the AgMPs. The newly formed silver nanoplates were bound by basal Ag{111} planes while the alternated Ag{111} and Ag{100} facets covered the lateral sides.<sup>16</sup> Thin layer of AgCl,<sup>13-15</sup> NH<sub>3</sub>,<sup>8</sup> and Cl<sup>-9-13</sup> were selectively adsorbed and passivated the Ag{111} facets. Therefore, Ag{100} facets grew faster than Ag{111} facets (Figures S7A and S7C). An anisotropic growth due to a faster expansion of lateral Ag{100} compared to that of lateral Ag{111} induces a cyclic structural transformation of triangular, truncated triangular, and hexagonal structures during the particle growth process.

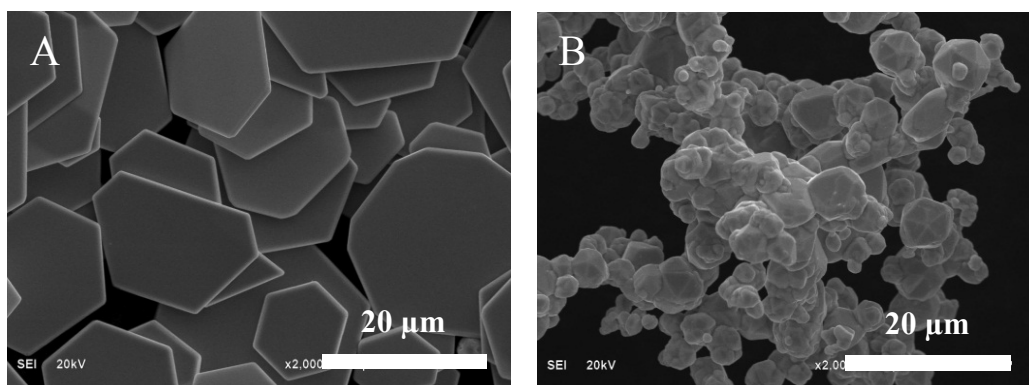

**Figure 8.** SEM micrographs show AgMPLs and AgMPs recovered from wasted AgCl using the developed method: (A) with PVP of 0.5% w/v and (B) without PVP. The recovery conditions were  $[AgCl] = 10 \text{ mM}$ ,  $[H_2O_2] = 220 \text{ mM}$ , and  $[NH_4OH] = 0.18 \text{ M}$ . Scale bars indicate 20  $\mu\text{m}$ .

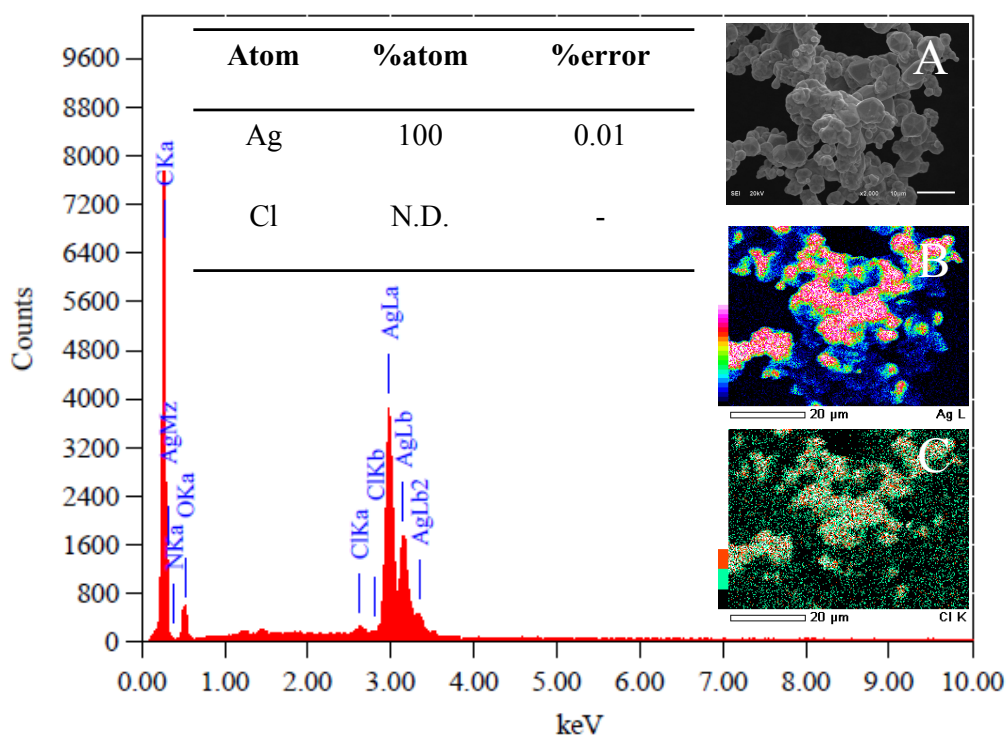

**Figure S9.** EDS spectrum of AgMPs recovered from waste AgCl using our developed protocol (A) SEM micrograph (B) silver map and (C) chloride map. By rinsing the AgMPs several times with 0.1 M  $NH_4OH$  solution, the residual AgCl on the surface can be completely removed, as suggested by EDS measurement.

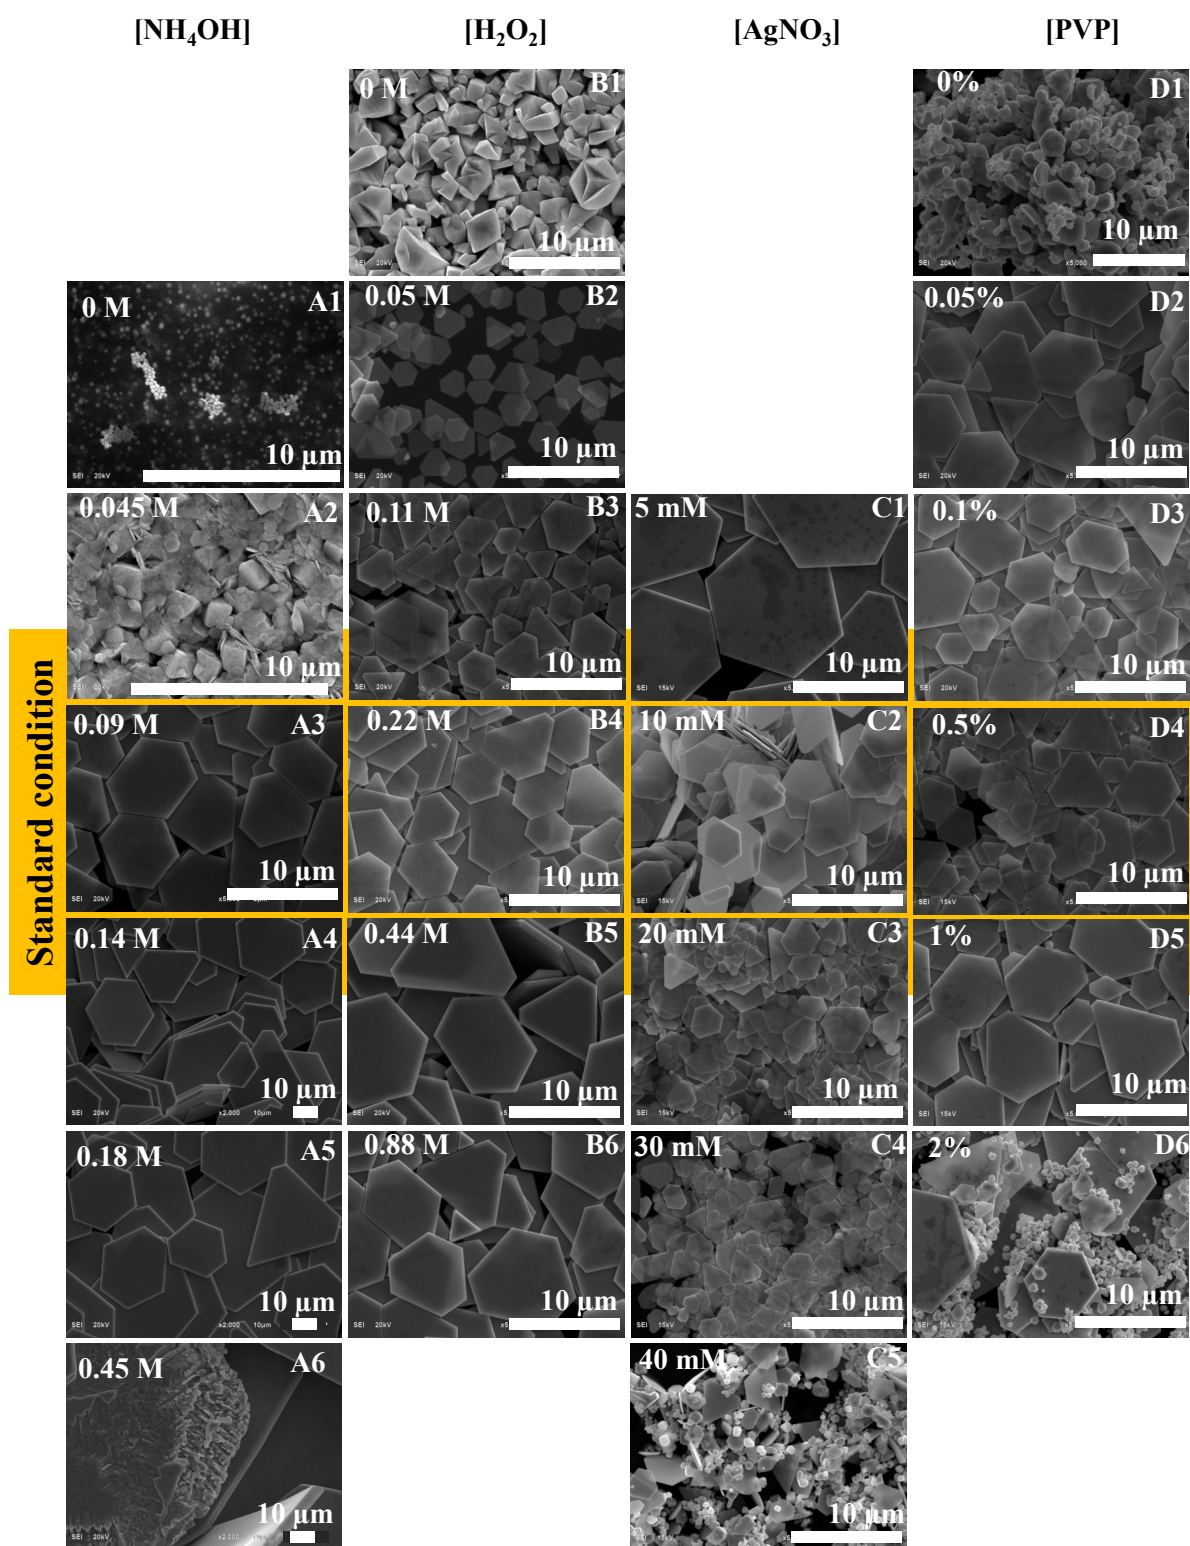

**Figure S10.** Expanded SEM micrographs of Figure 3 show morphological change of AgMPs induced by the experimental condition: (A) NH<sub>4</sub>OH, (B) H<sub>2</sub>O<sub>2</sub>, (C) AgNO<sub>3</sub>, and (D) PVP. The concentration is indicated in the figure. The scale bars indicate 10 μm.

## References

1. M. Tsuji, S. Gomi, Y. Maeda, M. Matsunaga, S. Hikino, K. Uto, T. Tsuji and H. Kawazumi, *Langmuir*, 2012, **28**, 8845-8861.
2. S. H. Im, Y. T. Lee, B. Wiley and Y. Xia, *Angewandte Chemie*, 2005, **117**, 2192-2195.
3. X. Tang, M. Tsuji, P. Jiang, M. Nishio, S.-M. Jang and S.-H. Yoon, *Colloids and Surfaces A: Physicochemical and Engineering Aspects*, 2009, **338**, 33-39.
4. B. Wiley, T. Herricks, Y. Sun and Y. Xia, *Nano Letters*, 2004, **4**, 1733-1739.
5. S. Xu, B. Tang, X. Zheng, J. Zhou, J. An, X. Ning and W. Xu, *Nanotechnology*, 2009, **20**, 1-7.
6. C. M. Cobley, M. Rycenga, F. Zhou, Z.-Y. Li and Y. Xia, *The Journal of Physical Chemistry C*, 2009, **113**, 16975-16982.
7. M. J. Mulvihill, X. Y. Ling, J. Henzie and P. Yang, *Journal of the American Chemical Society*, 2009, **132**, 268-274.
8. J. Du, B. Han, Z. Liu, Y. Liu and D. J. Kang, *Crystal Growth & Design*, 2007, **7**, 900-904.
9. G. Aloisi, A. M. Funtikov and T. Will, *Journal of Electroanalytical Chemistry*, 1994, **370**, 297-300.
10. G. Beltramo and E. Santos, *Journal of Electroanalytical Chemistry*, 2003, **556**, 127-136.
11. M. L. Foresti, M. Innocenti, F. Loglio, L. Becucci and R. Guidelli, *Journal of Electroanalytical Chemistry*, 2010, **649**, 89-94.
12. B. M. Jović, V. D. Jović and D. M. Dražić, *Journal of Electroanalytical Chemistry*, 1995, **399**, 197-206.
13. K. R. Temsamani and K. Lu Cheng, *Sensors and Actuators B: Chemical*, 2001, **76**, 551-555.
14. B. V. Andryushechkin, K. N. Eltsov and V. M. Shevlyuga, *Surface Science*, 1999, **433-435**, 109-113.
15. K. J. Stevenson, X. Gao, D. W. Hatchett and H. S. White, *Journal of Electroanalytical Chemistry*, 1998, **447**, 43-51.
16. D. Aherne, D. M. Ledwith, M. Gara and J. M. Kelly, *Advanced Functional Materials*, 2008, **18**, 2005-2016.
